# Supplementary material for: N-Acetyl-l-leucine improves functional recovery and attenuates cortical cell death and neuroinflammation after traumatic brain injury in mice
Source: PubMed Central journal article supplement (PMC8084982; doi:10.1038/s41598-021-88693-8), 2021-04-29

Figure S1

**a**

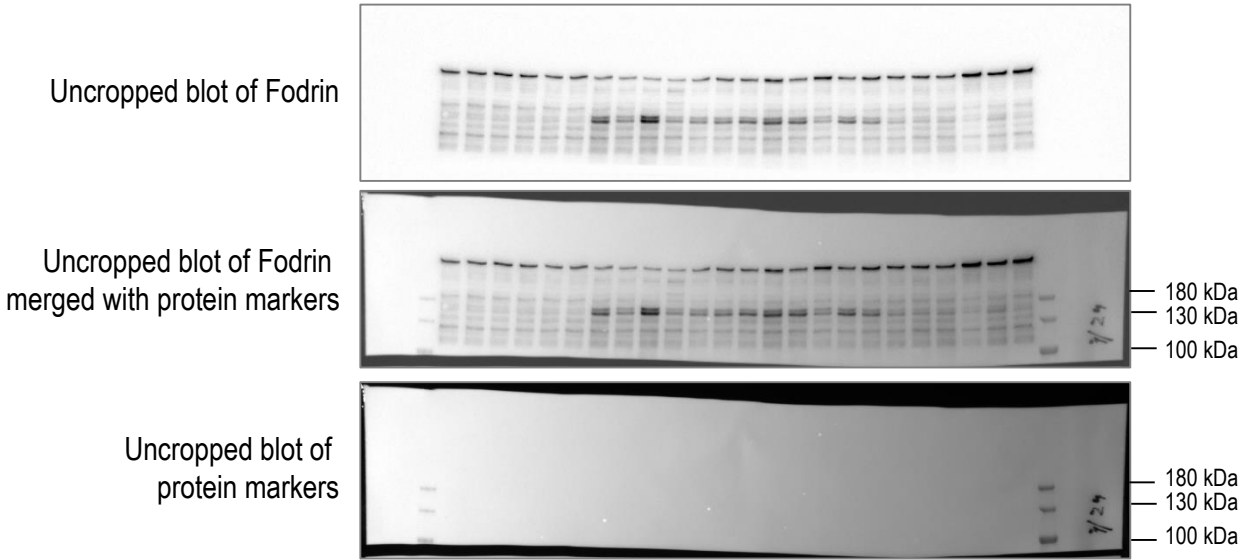

**b**

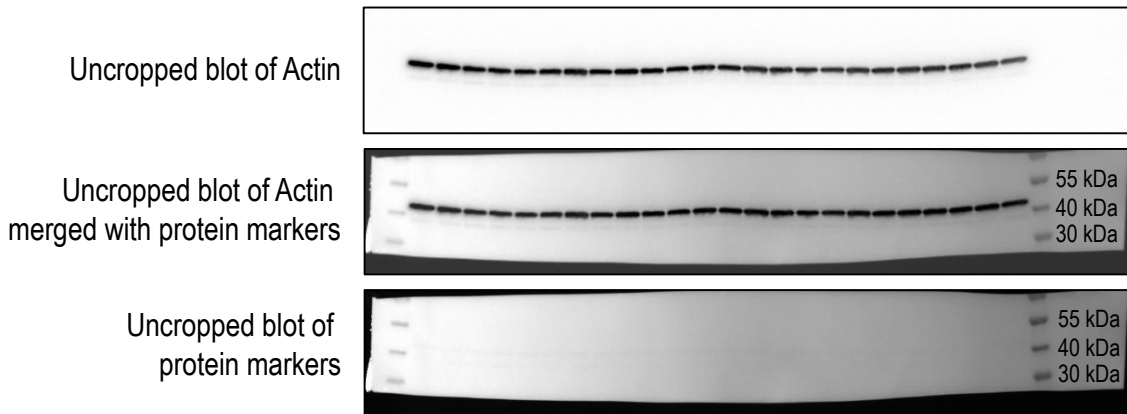

Figure S2

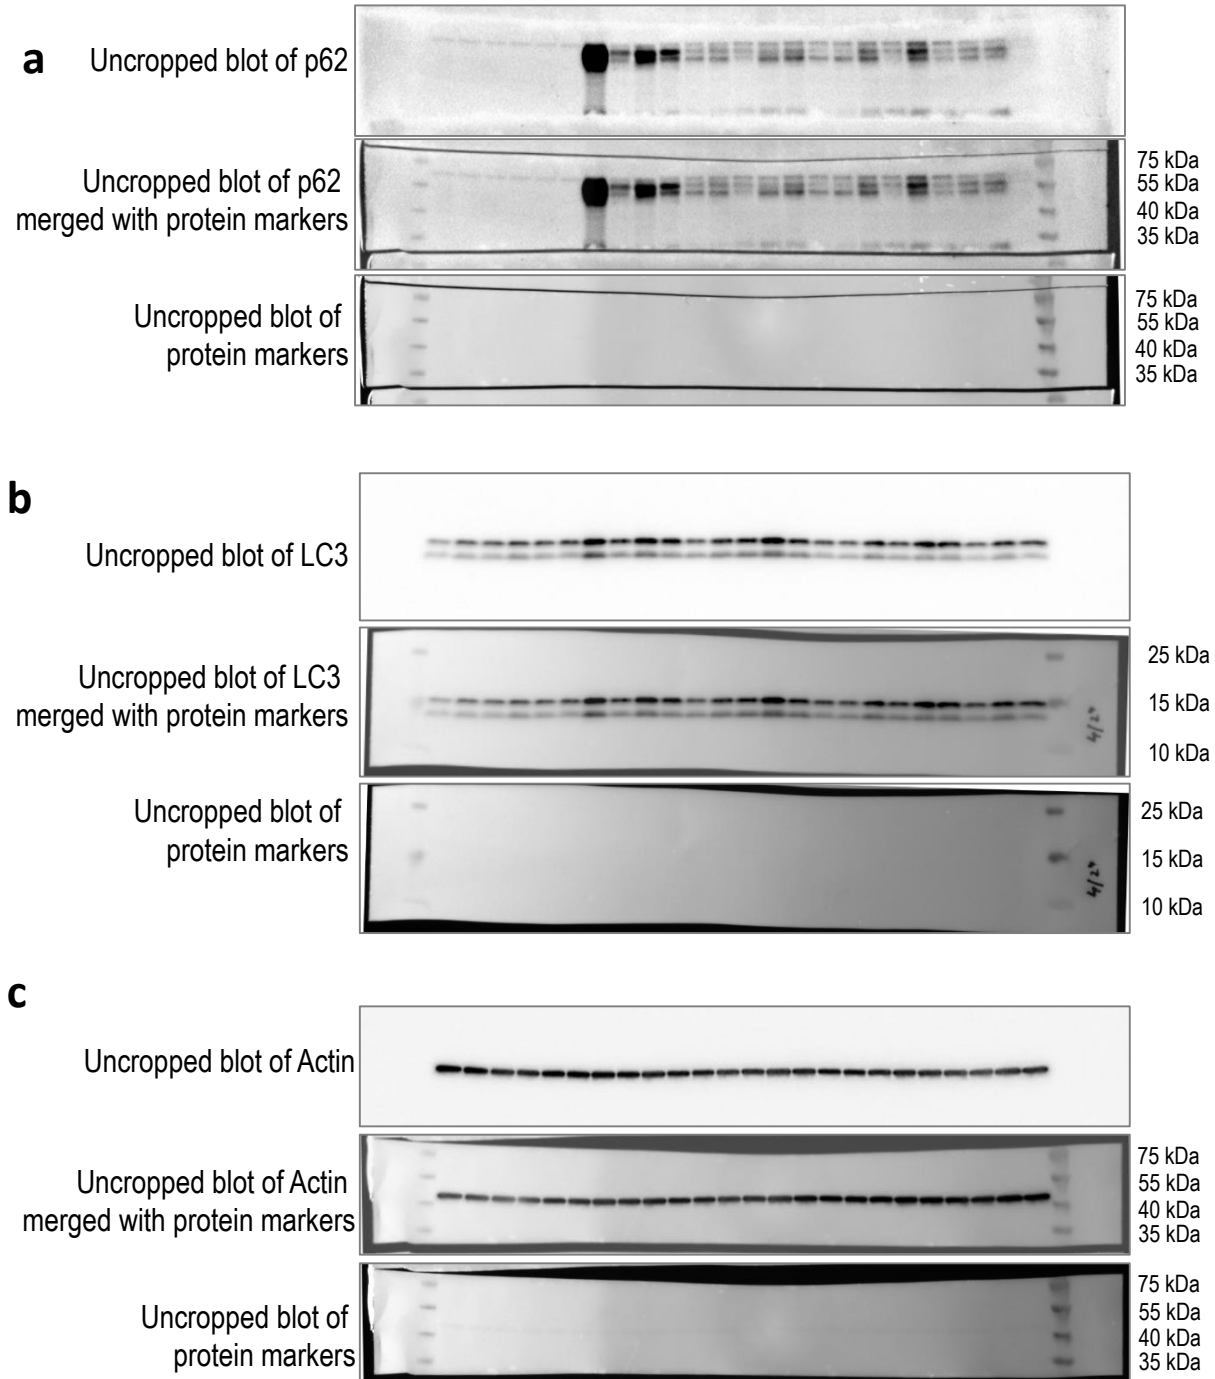

Supplement: 41598_2021_88693_MOESM1_ESM.pdf [file 41598_2021_88693_MOESM1_ESM.pdf]
